## **Reduced representation sequencing accurately quantifies relative abundance and reveals population-level variation in *Pseudo-nitzschia* spp.**

Carly D. Kenkel<sup>\*a</sup>, Jayme Smith<sup>b</sup>, Katherine A. Hubbard<sup>c,d</sup>, Christina Chadwick<sup>c</sup>, Nico Lorenzen<sup>a</sup>, Avery O. Tatters<sup>e</sup> & David A. Caron<sup>a</sup>

<sup>a</sup>Department of Biological Sciences, University of Southern California, 3616 Trousdale Parkway, Los Angeles, CA 90089, USA

<sup>b</sup>Southern California Coastal Water Research Project, 3535 Harbor Boulevard, Suite 110, Costa Mesa, CA, 92626, USA

<sup>c</sup>Florida Fish and Wildlife Conservation Commission-Fish and Wildlife Research Institute (FWC-FWRI), 100 8th Ave. SE, St. Petersburg, FL 33701, USA

<sup>d</sup>Biology Department, Woods Hole Oceanographic Institution, 266 Woods Hole Road, Woods Hole, MA 02543, USA

<sup>e</sup>U.S. Environmental Protection Agency, Gulf Ecosystem Measurement and Modeling Division, 1 Sabine Island Drive, Gulf Breeze, FL, 32561, USA

\*corresponding author: [ckenkel@usc.edu](mailto:ckenkel@usc.edu), phone: 213-821-1705, fax: 213-740-8123

Keywords: harmful algal bloom, community composition, population genomics, next-generation sequencing, 2b-RAD

Highlights: (3-5 bullet points, max 85 chars)

- 2bRAD method facilitates species- and population-level analysis of the same sample
- Method accurately quantifies species relative abundance with low false positives
- Consistent shifts in allele frequencies were detected between high and low DA years
- Certain *Pseudo-nitzschia* spp. populations may be more associated with DA presence

1 **Abstract**

2 Certain species within the genus *Pseudo-nitzschia* are able to produce the neurotoxin  
3 domoic acid (DA), which can cause illness in humans, mass-mortality of marine animals,  
4 and closure of commercial and recreational shellfisheries during toxic events.  
5 Understanding and forecasting blooms of these harmful species is a primary management  
6 goal. However, accurately predicting the onset and severity of bloom events remains  
7 difficult, in part because the underlying drivers of bloom formation have not been fully  
8 resolved. Furthermore, *Pseudo-nitzschia* species often co-occur, and recent work suggests  
9 that the genetic composition of a *Pseudo-nitzschia* bloom may be a better predictor of  
10 toxicity than prevailing environmental conditions. We developed a novel next-generation  
11 sequencing assay using restriction site-associated DNA (2b-RAD) genotyping and applied it to  
12 mock *Pseudo-nitzschia* communities generated by mixing cultures of different species in known  
13 abundances. On average, 94% of the variance in observed species abundance was explained  
14 by the expected abundance. In addition, the false positive rate was low (0.45% on average) and  
15 unrelated to read depth, and false negatives were never observed. Application of this method to  
16 environmental DNA samples collected during natural *Pseudo-nitzschia* spp. bloom events in  
17 Southern California revealed that increases in DA were associated with increases in the relative  
18 abundance of *P. australis*. Although the absolute correlation across time-points was weak, an  
19 independent species fingerprinting assay (Automated Ribosomal Intergenic Spacer Analysis)  
20 supported this and identified other potentially toxic species. Finally, we assessed population-  
21 level genomic variation by mining SNPs from the environmental 2bRAD dataset. Consistent  
22 shifts in allele frequencies in *P. pungens* and *P. subpacifica* were detected between high and  
23 low DA years, suggesting that different intraspecific variants may be associated with prevailing  
24 environmental conditions or the presence of DA. Taken together, this method presents a  
25 potentially cost-effective and high-throughput approach for studies aiming to evaluate both  
26 population and species dynamics in mixed samples.

27  
28  
29  
30  
31  
32  
33  
34  
35  
36  
37  
38  
39  
40  
41  
42  
43

## 44 1. Introduction

45

46 Multiple species of the diatom genus *Pseudo-nitzschia* produce the water-soluble neurotoxin,  
47 domoic acid (DA). The toxin bioaccumulates via food web transfer, leading to illness and mass  
48 mortality of marine animals (Bejarano et al., 2008; Kvittek et al., 2008; Moriarty et al., 2021),  
49 significant economic costs to commercial and recreational shellfisheries (Moore et al., 2020;  
50 Wessells et al., 1995), and amnesic shellfish poisoning in humans who consume contaminated  
51 seafood (Trainer et al., 2012). Blooms of toxigenic *Pseudo-nitzschia* cause significant negative  
52 impacts in many regions of the world, including along the west coast of North America, where  
53 fishery closures and animal mortality occur frequently (Scholin et al., 2000; Smith et al., 2018a;  
54 Trainer et al., 2012). In California, blooms have been increasing in frequency and severity in  
55 recent years (Schnetzer et al., 2013; Trainer et al., 2010). In 2007, DA concentrations in  
56 mussels collected in California reached  $610 \mu\text{g g}^{-1}$ , more than 30 times higher than the U.S.  
57 Food and Drug Administration (FDA) tissue safety level of  $20 \mu\text{g g}^{-1}$  (Trainer et al., 2012). In  
58 2014, multiple mussel samples from Marin County contained DA concentrations in excess of  
59  $1000 \mu\text{g g}^{-1}$  (Langlois et al., 2014). *Pseudo-nitzschia* spp. bloom 'hot spots' in California are  
60 spread along the coast, from Monterey Bay in the north to San Luis Obispo and Point  
61 Conception, and the San Pedro/Long Beach Harbor area (Schnetzer et al., 2013; Smith et al.,  
62 2018a; Trainer et al., 2012), but it is not clear what attributes unite these geographically distant  
63 sites to promote HAB development.

64

65 Environmental factors implicated in bloom formation include nutrient enrichment from terrestrial  
66 sources, coastal upwelling, and mesoscale eddies (Anderson et al., 2008; Schnetzer et al.,  
67 2013). The grand majority of DA impacts on coastal ecosystems have been described in  
68 eastern boundary upwelling regions, including along the U.S. west coast where the California  
69 Current prevails (Trainer et al., 2010). Prior work has suggested that in California, blooms are  
70 associated with weak upwelling, lower salinity, temperature gradients and low macronutrient  
71 levels (Kudela et al., 2002). Culture and field studies have shown that phosphorus and silicate  
72 limitation can increase DA production (Fehling et al., 2004). The form of nitrogen can also play a  
73 role in DA production (Cochlan et al., 2008; Howard et al., 2007; Kudela et al., 2008), as can  
74 trace metal availability, including iron limitation and copper toxicity (Wells et al., 2005).  
75 Increased  $\text{pCO}_2$  has also been shown to increase DA production, and increased  $\text{pCO}_2$  in  
76 combination with silicate limitation has a synergistic effect on DA production (Tatters et al.,  
77 2012). In addition to the abiotic environment, biotic interactions, such as bacterial associations  
78 have also been implicated in toxin production (Bates et al., 1995). However, in field studies,  
79 consistent relationships between DA levels and specific environmental conditions have been  
80 less clear, with one study finding an association with colder, more saline water (Schnetzer et al.,  
81 2013); another, with dissolved silicic acid concentration (Smith et al., 2018b). While bloom risk  
82 mapping models have been developed for the California coast (C-HARM, (Anderson et al.,  
83 2016)), it remains challenging to predict the onset and severity of *Pseudo-nitzschia* bloom and  
84 toxic events, in part because the underlying drivers have not been fully resolved (Lelong et al.,  
85 2012; Smith et al., 2018b) and also because blooms are often a mixture of co-occurring species  
86 not all of which are toxigenic, or actively producing toxins for those that are.

87

88 More than 52 species of *Pseudo-nitzschia* have been described, but not all are toxigenic (Bates  
89 et al., 2018). Among the 26 species currently known to produce DA, toxin production was  
90 reported to be non-constitutive (Bates et al., 2018; Lelong et al., 2012; Trainer et al., 2012).  
91 Thus, variation in toxin concentrations during *Pseudo-nitzschia* blooms may stem from the  
92 presence or absence of exacerbating environmental factors and the ability to accurately  
93 measure such factors. This difference may also be due to an inability to accurately identify  
94 species- and population-level variation in *Pseudo-nitzschia* bloom composition. Recent work in  
95 several systems has indicated that the presence of certain species may be an important  
96 predictor of bloom toxicity, in addition to prevailing physiochemical factors such as temperature,  
97 salinity and nutrients (Clark et al., 2019; Smith et al., 2018b). In the San Pedro/Long Beach  
98 Harbor bloom hot spot, elevated DA concentration has been associated with community-level  
99 dominance of *Pseudo-nitzschia australis* and/or *P. seriata* (Schnetzer et al., 2013; Smith et al.,  
100 2018b). *P. multiseriata* has also been reported as a major toxin producer in California (Trainer et  
101 al., 2000), but further north in Washington, *P. cf. pseudodelicatissima* and *P. cuspidata* join *P.*  
102 *australis* and *P. multiseriata* as dominant toxin producers (Trainer et al., 2009).

103  
104 Taxonomic identification of protists, such as *Pseudo-nitzschia*, is largely based on morphology,  
105 but salient features may not be sufficient to distinguish species with similar morphologies (Adl et  
106 al., 2007). Ultrastructural features of diatom cell walls visualized using scanning electron  
107 microscopy have long been the gold standard for species delineation (Round et al., 1990).  
108 However, the application of DNA sequencing revealed significant cryptic diversity –  
109 morphologically similar algae can have different genetic profiles (Alverson, 2008). Various genetic  
110 assays have been developed to genotype *Pseudo-nitzschia* spp., including direct sequencing of  
111 ribosomal gene regions (Casteleyn et al., 2010; Lim et al., 2014; Orsini et al., 2004), and DNA  
112 fingerprinting (Bornet et al., 2005) including microsatellites (Evans et al., 2004; Evans and Hayes,  
113 2004). Automated Ribosomal Intergenic Spacer Analysis (ARISA) was more recently developed  
114 to distinguish *Pseudo-nitzschia* species within a heterogeneous bloom without the need for  
115 culturing (Hubbard et al., 2008), but this method still relies on a single locus, which limits the  
116 resolution of population genetic analyses because estimates of relatedness based on single loci  
117 are noisy (Lynch and Milligan, 1994). Furthermore, in spite of its broader field applicability, ARISA  
118 is still unable to fully resolve differences among certain *Pseudo-nitzschia* species in California,  
119 including *P. australis*, putatively one of the most toxic species, and another potentially toxic  
120 species, *P. seriata* (Hubbard et al., 2008).

121  
122 Metagenomic analyses have the potential to provide increased taxonomic resolution, but as  
123 *Pseudo-nitzschia* spp. genomes can be large (e.g. *P. multiseriata*, 218 Mbp, (Osuna-Cruz et al.,  
124 2020)) it will be challenging to cost-effectively obtain sufficient coverage for high-resolution  
125 spatial and temporal datasets. Reduced representation sequencing using Restriction site-  
126 Associated DNA (RAD) was originally developed for population genetic analyses of multicellular  
127 organisms (Hohenlohe et al., 2010). However, this method has the potential to cost-effectively  
128 facilitate understanding of both community and population-level variation in single-cell  
129 eukaryotes. RAD can identify and score thousands of genetic markers from individual or pooled  
130 samples (Davey and Blaxter, 2010; Schlötterer et al., 2014). It is analogous to other molecular  
131 genotyping methodologies, such as restriction fragment length polymorphisms (RFLPs) and

132 amplified fragment length polymorphisms (AFLPs), which have been used to study  
133 phytoplankton population genetics since the late 1970s (Bruin et al., 2003), in that it reduces the  
134 complexity of the genome by subsampling only restriction enzyme recognition sites (Davey and  
135 Blaxter, 2010). However, RAD greatly surpasses these and other methods, including  
136 microsatellites, in its ability to identify, verify and score markers simultaneously and without an  
137 extensive developmental process – genotyping can be accomplished ‘*de novo*’, even on species  
138 with no prior sequence data (Davey and Blaxter, 2010; Matz, 2018). 2b-RAD is a type of RAD  
139 sequencing which uses type IIB restriction enzymes (Wang et al., 2012). These enzymes cut  
140 upstream and downstream of their recognition sites, generating uniform 36-bp DNA fragments,  
141 or tags, ideally suited for next-generation short read sequencing technologies. Analysis of  
142 within-species (~population) genomic variation is based on identifying single nucleotide  
143 polymorphisms (SNPs) that occur within these 36-bp fragments and calculating allele  
144 frequencies based on read counts of tags containing alternate alleles. Here we develop a novel  
145 next-generation sequencing based assay using 2b-RAD and apply it to mock *Pseudo-nitzschia*  
146 communities generated by mixing cultures of different species in known abundances and field  
147 samples collected during natural *Pseudo-nitzschia* spp. bloom events.

148

## 149 **2. Methods**

150

### 151 *2.1 Reference Cultures*

152 *Pseudo-nitzschia* cultures were initiated from individual chains collected from multiple locations  
153 in the North Pacific. Seven strains representing four species, *P. australis* (isolated at Gaviota  
154 Beach, Santa Barbara County, California, 34.47° N, 120.23° W in April 2016), *P. sp.* (2 cultures,  
155 isolated from near Station Aloha 22.75°N, 158°W in May 2016), *P. pungens* (3 cultures, isolated  
156 from Newport Beach, Orange County, California, 33.61° N, 117.93° W in March 2017), and *P.*  
157 *subpacific*a (also isolated from Newport Beach, Orange County, California in March 2017), were  
158 grown in a modified F medium with 50% nutrient concentration (35.3  $\mu\text{M}$   $\text{NO}_3^-$ , 4.24  $\mu\text{M}$   $\text{SiO}_4^{2-}$ , 1  
159  $\mu\text{M}$   $\text{PO}_4^{3-}$ ) in autoclaved 0.2  $\mu\text{m}$  filtered seawater. Incubators maintained cultures at 15°C,  
160 except for the *P. sp.* cultures which were maintained at 22°C. Cells were maintained under a  
161 12h:12h light:dark cycle using cool white fluorescent illumination ( $\sim 110 \mu\text{mol photons m}^{-2} \text{s}^{-1}$ ).  
162 Cultures were visually inspected every 7-10 days with a dissecting scope for morphological  
163 signatures of health including proper cell shape and chain formation and transferred to new  
164 media on this same schedule.

165

166 *Pseudo-nitzschia* species were initially distinguished by overall size, shape of valve ends, and  
167 degree of valve overlap within chains by examination up to 400x magnification using light  
168 microscopy. *P. australis* (Fig. S1A), *P. pungens* (Fig. S1B) and *P. subpacific*a isolates were  
169 identified using frustule features including poroids, interstriae and fibulae observed via scanning  
170 electron microscopy (SEM). Respective samples were processed according to Hasle and  
171 Syvertsen (Hasle and Syvertsen, 1997). The cleaned frustules were observed with a Philips XL  
172 30 S, FEG SEM. The small-celled *P. sp.* isolates were evaluated using light microscopy.

173

174

175

## 176 2.2 *Generating Mock Communities*

177 Mock communities were generated with cultured isolates identified to species level. Replicate  
178 community mixes with individual species representatives ranging in relative abundance from 10  
179 (0.01%) to 99,990 cells (99.99%) in 100,000 total cells (Table 1) were generated to approximate  
180 the minimum bloom threshold of 80,000 cells/L previously described at Newport Pier, CA  
181 (Seubert et al., 2013). Triplicate cell counts were completed using a Sedgwick Rafter for each  
182 reference species after staining a 4-mL aliquot with 50  $\mu$ L/mL Lugol's Solution. A minimum of  
183 400 cells were counted in each count and the relative standard deviation of the triplicate counts  
184 ranged from 2-10% (Table S1). Culture volumes were pooled within 4 hours of cell enumeration  
185 and immediately deposited onto 25mm GF/F filters (nominal pore size 0.7 microns) which were  
186 stored at -20°C until DNA extractions were completed. The level of detection for cellular  
187 enumeration was 3,000 cells/L for each individual count and so mix fractions represented by  
188 less than 3,000 cells (0.1 and 0.01%) were made through serial dilution prior to mixing. There  
189 were 6 mix types in addition to pure culture samples as detailed in Table 1.

190

191

Table 1. Replication of mock culture sample mixing scheme.

| <b>Targeted cell<br/>abundance ratio</b> | <b>Percent<br/>abundance ratio</b> | <b>N replicate<br/>mixes per ratio</b> |
|------------------------------------------|------------------------------------|----------------------------------------|
| 100,000                                  | 100%                               | 3-5 per species                        |
| 99,990 : 10                              | 99.99% : 0.01%                     | 8                                      |
| 99,900 : 100                             | 99.9% : 0.1%                       | 4                                      |
| 75,000 : 20,000 : 5,000                  | 75% : 20% : 5%                     | 3                                      |
| 66,000 : 33,000                          | 66% : 33%                          | 1                                      |
| 60,000 : 30,000 : 10,000                 | 60% : 30% : 10%                    | 4                                      |
| 40,000 : 30,000 : 30,000                 | 40% : 30% : 30%                    | 4                                      |
| 33,000 : 33,000 : 33,000                 | 33% : 33% : 33%                    | 3                                      |
| 50,000 : 50,000                          | 50% : 50%                          | 3                                      |

192

193

## 194 2.3 *DNA extraction from mock community mixes*

195 Pure culture and mock community mix samples were extracted using a phenol-chloroform  
196 protocol modeled after (Countway et al., 2005). Briefly, 2 mL of lysis buffer comprised of 40 mM  
197 EDTA (ph 8), 100 mM Tris (ph 8), 100mM NaCl, and 1% SDS weight/volume was added to  
198 frozen filters in 15 mL Falcon tubes. Tubes were thawed at 70°C in a water bath after which 200  
199  $\mu$ L of 0.5 mm zirconia/silica beads (BioSpec Products) were added. The mixture was vortexed  
200 for 1 minute then heated at 70°C for 5 minutes for four repetitions to lyse the cells and break  
201 down the filter. The lysate and filter mixture was transferred to a 10 mL syringe and lysate was  
202 dispensed into a new 15 mL Falcon tube. 2.5 M NaCl and 10% CTAB were added to yield a 0.7  
203 M NaCl 1% CTAB solution and the full mixture was incubated for 10 minutes at 70°C.

204 An equal volume of 25:24:1 phenol:chloroform:isoamyl alcohol (Sigma) was added and the  
205 mixture was vortexed and centrifuged at 4750 RPM for 10 minutes. After the layers settled the  
206 bottom layer was removed via pipetting and discarded. An equal volume of  
207 phenol:chloroform:isoamyl alcohol was again added and the mix was vortexed and centrifuged  
208 at 4750 RPM for 10 minutes. The supernatant was removed and placed in a new Falcon tube.

209 The supernatant was extracted by performing two repetitions of adding an equal volume  
210 addition of 24:1 chloroform: isoamyl alcohol (Sigma), vortexing, centrifuging at 4750 RPM for 10

211 minutes and discarding the bottom layer up to the interface. The supernatant was distributed  
212 into 1.5 mL Eppendorf tubes in 400  $\mu$ L aliquots. Each aliquot was precipitated in 800  $\mu$ L of cold  
213 95% ethanol and 0.1X volume of 10.5 M ammonium acetate (40  $\mu$ L), vortexed and incubated  
214 overnight at -20°C.

215 Following incubation samples were centrifuged at 14000 RPM for 30 minutes at 4°C. Liquid was  
216 decanted and the pellet was rinsed in 70% cold ethanol and centrifuged at 14000 RPM for 15  
217 minutes at 4°C after which the liquid was decanted and the pellet was allowed to air dry. The  
218 pellet of each aliquot was suspended in 30  $\mu$ L MilliQ H<sub>2</sub>O and aliquots from the same sample  
219 were combined for DNA quantitation.

220 Extractions were further purified using a Genomic DNA Clean & Concentrator-10 kit (Zymo  
221 Research) according to the manufacturer's instructions. Briefly, the eluted DNA was combined  
222 with buffer and placed into a spin column. Samples were washed and centrifuged before being  
223 eluted in 10  $\mu$ L elution buffer. Samples were vacuum-concentrated using a Speed Vac (Thermo  
224 Fisher, USA) on low speed for 1 min to yield a sufficient volume for the 2bRAD protocol (~8  $\mu$ L).

225

#### 226 2.4 Natural Time-series Samples

227 Weekly water samples were obtained as part of long-term SCCOOS & CeNCOOS Harmful  
228 Algal Bloom Monitoring Alert Program (<https://sccoos.org/harmful-algal-bloom/>) at Newport  
229 Beach Pier, CA (Kudela et al., 2015; Seubert et al., 2013; Smith et al., 2018a). Samples have  
230 been routinely collected since 2008 for the quantification of domoic acid and enumeration of  
231 harmful phytoplankton taxa, as well for basic physicochemical conditions. Particulate domoic  
232 acid (pDA) samples were collected via the filtration of 200 mL of sea water onto a GF/F filter  
233 and were frozen at -20°C until extraction. Samples were quantified via Enzyme-Linked  
234 ImmunoSorbant Assay (ELISA: Mercury Science, Durham, NC) with a detection limit of 0.02  
235 ng/mL. Samples below the detection limit were assumed to be zero for all calculations and  
236 statistical analyses. Seawater samples were collected and preserved with 3% formaldehyde  
237 (final concentration) for the enumeration of harmful phytoplankton taxa including *Pseudo-*  
238 *nitzschia*. Cells were enumerated using a Leica DM IRBE inverted light microscope (Leica  
239 Microsystems, Buffalo Grove, IL) at 400x after settling 25 mL of the sample in Utermöhl  
240 chambers for approximately 24 hours (Utermöhl, 1958). *Pseudo-nitzschia* cells were  
241 categorized into seriata size class (> 3  $\mu$ m) and delicatissima (< 3  $\mu$ m) size classes. Light  
242 microscopy based size sorting was conducted to differentiate between larger species more  
243 often associated with detectable pDA in the region and smaller cells that are more rarely  
244 associated with high toxin concentrations, as described in Seubert et al. (2013).

245

246 DNA was extracted from archived HABMAP sampling filters for 2bRAD sequencing. Samples  
247 were selected from the spring bloom in four different years in which *Pseudo-nitzschia* spp. cells  
248 were quantified, two in which pDA was observed (2017 and 2019) and two in which no DA  
249 was detected (2015 and 2018). Briefly, 500 mL of water were filtered onto a 25mm GF/F filter  
250 and subsequently frozen at -20°C. DNA was extracted from filters using a Qiagen Plant kit  
251 (Qiagen, USA).

252

253

## 254 2.5 Library Preparation and Sequencing

255 DNA samples from the mock community mixes were prepared for 2bRAD sequencing using the  
256 BcgI restriction endonuclease targeting 100% of restriction sites (Wang et al., 2012). The same  
257 protocol was used for the natural time-series samples, save that a 1/64 site reduction scheme  
258 was used. The full library preparation protocol is available at  
259 [https://github.com/z0on/2bRAD\\_denovo](https://github.com/z0on/2bRAD_denovo). Culture reference and mock community mix libraries  
260 were run on two lanes of Illumina HiSeq 2500, SR 50 format. Natural bloom libraries were run  
261 on four lanes of Illumina Nextseq 550, SR 75 format. All sequencing runs were carried out by  
262 the University of Southern California Genome core.

263

## 264 2.6 Generation of RAD reference libraries

265 All reads originating from pure culture samples were used to create independent RAD tag  
266 reference libraries for subsequent read mapping. 2bRAD tag references were also generated for  
267 the *Pseudo-nitzschia multiseries* reference genome (CLN-47, JGI) and a whole genome  
268 shotgun sequence set for *Pseudo-nitzschia multistriata* (CAACVS01, GCA\_900660405, ENA).  
269 Full scaffolds, mitochondria, and plastid assemblies were concatenated and a custom perl script  
270 was used to extract tags exhibiting the Bcg I restriction site motif. Full bioinformatic protocols  
271 and scripts can be found at <https://github.com/ckenkel/Pseudo-nitzschia2bRAD>. Briefly, for  
272 sequenced cultures, a custom perl script was used to trim sequencing adapters from raw reads,  
273 retaining only the 36-bp insert. These trimmed files were quality filtered using the fastx\_toolkit  
274 (Assaf and Hannon, 2010) requiring a minimum phred quality of 20 over 100% of the read. The  
275 bbduk command of the BMap package (Bushnell, 2014) was then used to filter reads matching  
276 to Illumina sequencing adapters. Reads passing these filtering criteria were clustered at 100%  
277 identity using a custom perl script to remove perfect duplicates, and only reads exhibiting a  
278 100% match to the restriction site were retained (Table S1).

279

280 As cultures were not axenic, reads were then filtered for contaminants based on a BLAST  
281 search against the NCBI nt database ((Sayers et al., 2019), downloaded 17 Jun 2020). Up to  
282 five alignments were reported for each read for matches below the e-value threshold of  $10^{-5}$ . A  
283 custom perl script was then used to summarize best hits using the NCBI taxonomy (Schoch et  
284 al., 2020). Contaminant reads were flagged as those exhibiting significant similarity to any non-  
285 Bacillariophyte sequence. Reads for each species were then clustered at 91% identity, which  
286 allows for up to 3 mismatches, or SNPs, per tag, using cd-hit (Fu et al., 2012; Li and Godzik,  
287 2006). Species clusters containing any reads previously identified as matching to a contaminant  
288 were removed using a custom bash script. Species specific references and known contaminants  
289 were then concatenated into a 'global' reference, retaining a species-level identifier within each  
290 tag.

291

## 292 2.7 Analysis of mock community mixes and natural time-series samples

293 All bioinformatic and statistical scripts can be found at [https://github.com/ckenkel/Pseudo-](https://github.com/ckenkel/Pseudo-nitzschia2bRAD)  
294 [nitzschia2bRAD](https://github.com/ckenkel/Pseudo-nitzschia2bRAD). A custom perl script was used to filter and trim raw reads. Reads were  
295 discarded if they did not contain the correct restriction site motif or adapter sequence, and those  
296 exhibiting the expected sequence construct were subsequently trimmed to remove adapter  
297 sequences. In addition, PCR duplicates were discarded by retaining only one representative



298 read for sequences sharing the same 64-fold degenerate adapter sequence, the first 34 bases  
299 of the insert, and the secondary barcode. Adapter trimmed reads were further filtered for quality,  
300 retaining only reads exhibiting Q20 over 100% of bases and exhibiting no match to Illumina  
301 adaptors using the fastx\_toolkit (Assaf and Hannon, 2010) and BMap (Bushnell, 2014)(Table  
302 S2). Reads were mapped against the global species reference library using bowtie2 (Langmead  
303 and Salzberg, 2012), default parameters, including the --very-sensitive flag) and a custom bash  
304 script was used to count the number of reads exhibiting high quality matches (reads with  
305 MAPQ<23, discarding any ambiguous matches) to each species reference.

306

307 Samples with fewer than 1000 high quality mapped reads remaining were removed. The false  
308 positive rate (FPR) was calculated as the sum of reads matching species known to be in each  
309 sample relative to the total number of high quality mapped reads for that sample. Accuracy was  
310 calculated as the absolute value of the difference between observed and expected percent  
311 abundance values for each focal species within each sample.

312

313 Coverage of natural time-series sample reads mapping to *Pseudo-nitzschia* spp. in the global  
314 reference library was lower than the 80-100x minimum coverage recommended for pooled  
315 sequencing (Schlötterer et al., 2014). Therefore, to achieve sufficient read depth to assess  
316 allelic diversity within species over time, mapped reads in SAM files were split by species and  
317 concatenated by year. Tags with three or more SNPs were excluded from further analysis and  
318 remaining SNPs were thinned to one per tag. A Cochran-Mantel-Haenszel test as implemented  
319 in Popoolation2 (Kofler et al., 2011) was subsequently used to test for consistent changes in  
320 allelic diversity between high DA and low DA years. We required the minimum allele count to be  
321 12, and the minimum and maximum coverage to be 50x and 200x respectively. P-values were  
322 calculated from pairwise comparisons of 2015 vs 2017 and 2018 vs 2019. Plotting and statistical  
323 analyses were carried out using the R language environment (v4.1.0, (R Core Team and  
324 Others, 2017).

325

## 326 *2.8 Amplification and identification using ARISA*

327 *Pseudo-nitzschia* species community composition in natural time series samples were also  
328 analyzed via ARISA. Genomic DNA concentrations were quantified on a plate reader (Biotek  
329 Instruments) using Picogreen (Invitrogen) and then standardized to 1ng  $\mu\text{L}^{-1}$  prior to  
330 amplification. Genus-specific oligonucleotides PnAll F (5'-TCTTCATTGTGAATCTGA-3') and  
331 FAM-labeled PnAll R (5'-CTTTAGGTCATTTGGTT-3') were used to amplify the ITS1 region  
332 (Hubbard et al., 2014, 2008). For PCR, 10 ng of genomic DNA was added to replicate (duplicate  
333 or triplicate) 20  $\mu\text{L}$  reactions consisting of 2.5 mM deoxynucleoside triphosphates, 0.4 mM of  
334 each primer, 0.75 U of Apex Taq polymerase, 2 mM of  $\text{MgCl}_2$ , and 1 x standard reaction buffer  
335 (Apex Bioresearch Products). Amplification was conducted using a 2-minute denaturation step  
336 at 94°C, followed by 32 cycles of 30 seconds at 95°C, 30 seconds at 50.6°C, and 60 seconds at  
337 72°C, and ending with a 10 minute extension at 72°C. Resulting products were purified using  
338 MultiScreen PCR $\mu$ 96 filter plates (Millipore). Replicate reactions were pooled, quantified using  
339 Picogreen, and diluted to 1 ng  $\mu\text{L}^{-1}$ . For fragment analysis, 1 ng of PCR product was processed  
340 using an Applied Biosystems 3730 XL DNA Analyzer (University of Illinois DNA Core  
341 Sequencing Facility) with a LIZ600 size standard. Electropherograms were analyzed using DAX

342 software (Van Mierlo Software Consultancy) to determine peak height and size (in base pairs or  
343 bp). Relative abundance of each amplicon was calculated by dividing the height of each  
344 individual peak by total peak height, and only those peaks that exceeded 3.0% of the total peak  
345 height were used in the final dataset following (Hubbard et al., 2014, 2008). Furthermore, only  
346 samples with a total peak height of >1000 relative fluorescent units (RFUs) were used. Relative  
347 peak height was previously determined to be correlated with the proportion of ITS1 copies  
348 added to the PCR, recognizing that larger-celled species generally have larger genomes and  
349 more ITS1 copies per cell (Hubbard et al., 2014) and was thus used to provide semi-quantitative  
350 data about changes in species contributions over time.

351 For each peak, 4 bp were added manually such that amplicon sizes for ARISA matched those  
352 based on *in silico* sequence comparisons. A subset of samples was selected for confirmatory  
353 ITS1 sequencing where 1  $\mu$ L of genomic DNA was amplified as described above (with an  
354 annealing temperature of 67°C) using 18SF-euk (5'-CTTATCATTAGAGGAAGGTGAAGTCG-  
355 3') and 5.8SR-euk (5'-CTGCGTTCTTCATCGTTGTGG-3') oligonucleotides. The resulting PCR  
356 product was run on a 3% agarose gel. Using sterile micropipette tips, distinct bands were  
357 individually picked from the gel and then gel picks were dissolved in 10  $\mu$ L of sterile molecular  
358 grade water for 5 minutes at 40°C prior to PCR amplification. The PnAll F/R primer set was  
359 utilized to amplify 1  $\mu$ L of the melted gel/sterile water mixture and the resulting PCR product was  
360 run on a 3% agarose gel to confirm the presence of a single band and assess approximate  
361 product size; gel picks from these products were used in another round of PCR with the PnAll  
362 F/R primer set. A 1.5% agarose gel was used to confirm single band product sizes and  
363 remaining products were purified using ExoSap-It Express PCR Product Cleanup Reaction  
364 (Applied Biosystems). Purified products were then sequenced on a 3730 XL DNA Analyzer  
365 (Applied Biosystems) by Eurofins Genomics LLC. Sequences were analyzed using Sequencher  
366 software (Gene Codes Corporation) and identified using BLASTn to query the National Center  
367 for Biotechnology Information's (NCBI) GenBank nucleotide database (Sayers et al., 2019) to  
368 verify sizes determined by ARISA. Linear models were used to compare the relative abundance  
369 of focal species derived using the different methods (ARISA vs 2bRAD) and a Fisher's exact  
370 test was applied to compare presence/absence based detection using a contingency table  
371 comparing the overlap between positive and negative calls for each method.

372

### 373 3. RESULTS

374

#### 375 3.1 Reference Library Construction

376 Sequencing yielded a total of 133,370-452,059 raw reads for each species (Table 2). Of these,  
377 between 6.5-24.4% were identified as non-Bacillariophyte contaminants. The majority of  
378 contaminants exhibited best matches to Proteobacteria (Fig. S2). Some bacteria were  
379 previously identified as putative associates of diatoms and *Pseudo-nitzschia* spp. including  
380 *Sulfitobacter pseudonitzschiae*, which comprised 0.1-0.5% of the total contaminant sequences  
381 identified across species and *Marinobacter salarius*, which occurred at low abundance in most  
382 species (<5%) but dominated contaminant sequences in *P. australis* cultures, comprising more  
383 than 93% (76,814) of the tags identified as contaminants. Removal of any clusters with  
384 individual sequences exhibiting matches to contaminants yielded a final set of 71,889-113,898

385 read clusters by species, on par with the number of Bcgl restriction sites identified in the *P.*  
 386 *multiseriis* reference genome (81,121, Table 2).  
 387

388 Table 2. Sequencing effort, clustering, and contaminant removal to generate 2bRAD reference  
 389 libraries per species. Tags: reads trimmed to retain only the Bcgl restriction site motif; HQ: high  
 390 quality, defined as reads exhibiting a minimum phred quality of 20 over 100% of the read and  
 391 not containing any Illumina adapters.

| Species                          | N sequencing replicates | N HQ unique tags | N contaminant tags | N initial tag clusters | N clusters removed as contaminants | N clusters in final reference |
|----------------------------------|-------------------------|------------------|--------------------|------------------------|------------------------------------|-------------------------------|
| <i>P. australis</i>              | 5                       | 336,268          | 82,192             | 83,852                 | 10,211                             | 73,641                        |
| <i>P. sp.</i>                    | 3                       | 133,370          | 19,974             | 87,639                 | 15,750                             | 71,889                        |
| <i>P. pungens</i>                | 4                       | 452,059          | 29,356             | 135,628                | 21,730                             | 113,898                       |
| <i>P. subpacifici</i>            | 3                       | 367,356          | 24,631             | 81,732                 | 5,660                              | 76,072                        |
| <i>P. multiseriis</i> (CLN 47)   | -                       | -                | -                  | -                      | -                                  | 81,121                        |
| <i>P. multistriata</i> (WGS set) | -                       | -                | -                  | -                      | -                                  | 27,881                        |

392  
 393

### 394 3.2 Accuracy and precision of reduced representation sequencing based estimates of species 395 abundance

396 The false positive rate (FPR), reflecting samples in which reads mapped to a reference species  
 397 not included in that mock community mix, was low, 0.45% on average, and was unrelated to  
 398 read depth (Fig. 1a). There was a significant difference in the FPR between mix types, with  
 399 samples derived from multi-species pools exhibiting an 0.68% FPR on average (range: 0.045 -  
 400 4.1%) whereas the FPR of 'pure' culture samples was 0.04% on average (range: 0 - 0.1%,  
 401  $t(26.15)=3.48$ ,  $p=0.0018$ , Fig. 1b). The highest false positive rates were observed in the most  
 402 extreme mixes (ratios greater than 99:1, Fig. 1). False negatives were never observed. That is  
 403 to say, species known to be included in the sample mix were always detected, even at very low  
 404 relative abundances, e.g. 0.01% (Fig. 1).  
 405

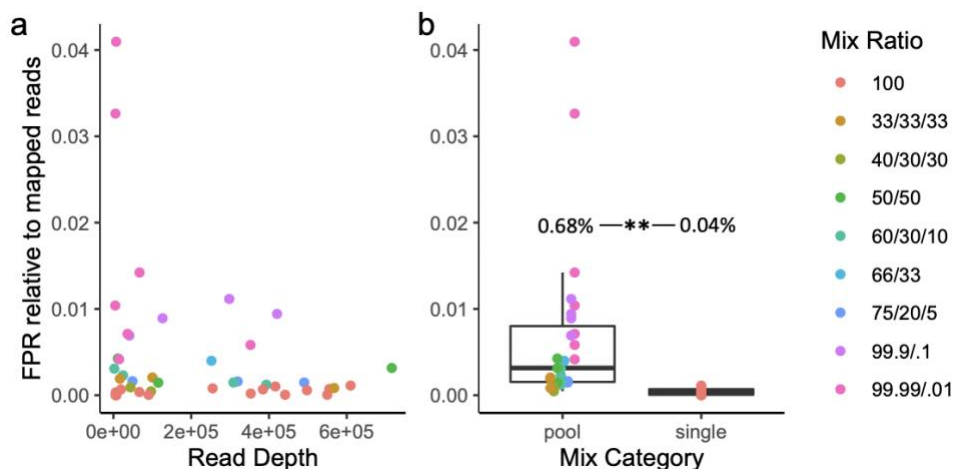

406  
 407  
 408  
 409  
 410  
 Figure 1. False positive rate (FPR) relative to high quality mapped reads as  
 a function of read depth (a) and whether the sample consisted of a single  
 species or multi-species pool (b). Individual samples are colored according  
 to their mix type ratio (Table 1).

411  
412 This pattern was also apparent when examining FPR by species, with significant increases in  
413 the FPR for reads mapping to *P. sp.* ( $t(26.1)=10.5$ ,  $p=4e-11$ ), *P. multiseriis* ( $t(39.1)=2.5$ ,  
414  $p=0.008$ ), *P. multistriata* ( $t(26)=2.89$ ,  $p=0.004$ ), and *P. pungens* ( $t(4.05)=4.45$ ,  $p=0.005$ )  
415 references in multi-species mixes relative to individual species samples and similar trends for  
416 the remaining species (Fig. S3).  
417  
418 On average, 94% of the variance in observed species abundance was explained by the  
419 expected abundance based on the target mix ratios ( $R^2=0.94$ ,  $F(1,79)=1350$ ,  $p<0.001$ , Fig. 2A).  
420 Expected abundances were also a strong predictor of observed abundances, and the intercept  
421 was not significantly different from zero ( $\alpha=0.24$ ,  $\beta=0.95$ ,  $t(79)=36.7$ ,  $p<0.001$ ). However, fit did  
422 differ between species, with *P. australis* having a higher intercept on average than *P. pungens*  
423 and *P. subpacificica* (Fig. 2a). Accuracy was not a function of species ( $F(3,77)=2.45$ ,  $p=0.07$ ),  
424 although mixes with *P. subpacificica* tended to be more accurate (Fig. 2b). Accuracy did differ  
425 among mix types ( $F(8,72)=12.54$ ,  $p=4.3e-11$ , Fig. 2c). More equal mixes, for example those with  
426 a ratio of 33:33:33 of three species, were less accurate than more extreme mixes, or those with  
427 a ratio >99:1 of two species (Tukey's HSD < 0.001, Fig. 2c). Accuracy also differed among  
428 culture replicates ( $F(8,72)=4.38$ ,  $p=0.0002$ , Fig. 3d). For example, more error was observed for  
429 the C5 culture replicate of *P. pungens* than for C3 (Tukey's HSD=0.05, Fig. 2d).  
430  
431 **3.3 Abundance estimate of species in natural *Pseudo-nitzschia spp.* blooms using 2b-RAD**  
432 The dynamics of *Pseudo-nitzschia spp.* blooms differed across years. *Pseudo-nitzschia spp.*  
433 cells were observed every year, but pDA was only detected in 2017 and 2019 (Fig. 3a-c).  
434 Although samples were sequenced for 55 out of 56 total time-points, the overall percent of high  
435 quality reads mapping to the six species reference was generally very low (Fig. 3d).  
436 Consequently, we were unable to quantify species composition in some samples due to  
437 insufficient read depth (Fig. 1e, empty columns). Superficially, increases in pDA appeared to be  
438 associated with increases in the relative abundance of *P. australis*. However, the correlation  
439 across time-points was weak ( $R^2=0.05$ ,  $t(44)=1.8$ ,  $p=0.08$ , Fig. 3,S4). The relative abundance of  
440 *P. australis* did explain a significant portion of the variation in the percent of reads mapping to  
441 the six species reference ( $R^2=0.69$ ,  $\beta=0.56$ ,  $t(44)=10.06$ ,  $p<0.001$ , Fig. S5).

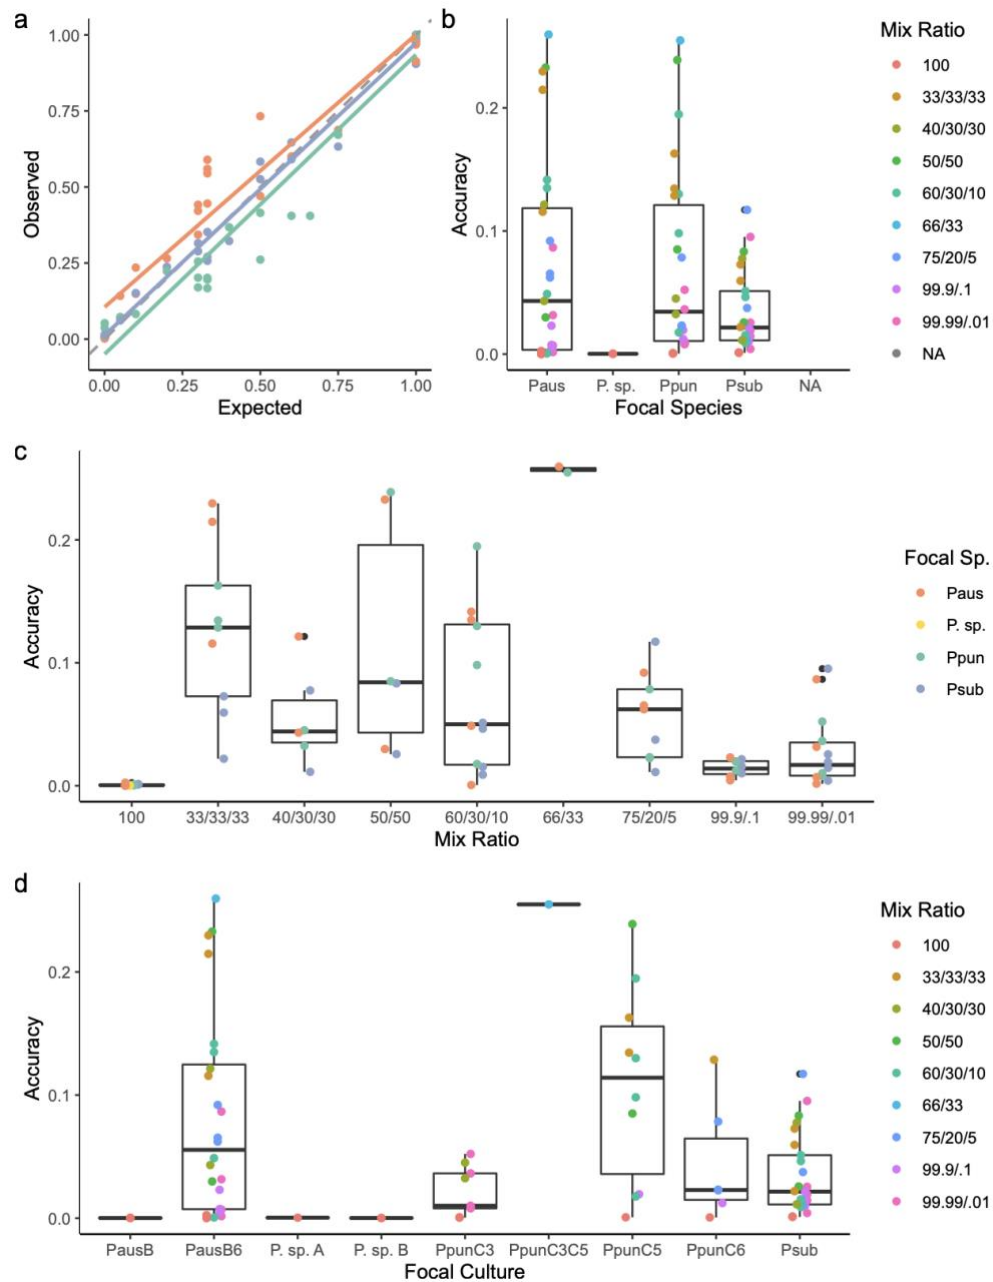

442  
443  
444  
445  
446  
447  
448  
449  
450  
451  
452

Figure 2. Accuracy of a reduced representation sequencing (2bRAD) method for quantifying species relative abundance. (a) Observed abundance, calculated as the proportion of reads mapping to the reference library, as a function of expected abundance based on the target proportion in the mock community mix varies by species. The dashed gray line is the 1:1 line. (b) Accuracy, or the deviation between observed and expected values, as a function of species and mix ratio. (c) Accuracy as a function of mix ratio and species. (d) Accuracy as a function of culture and mix ratio.

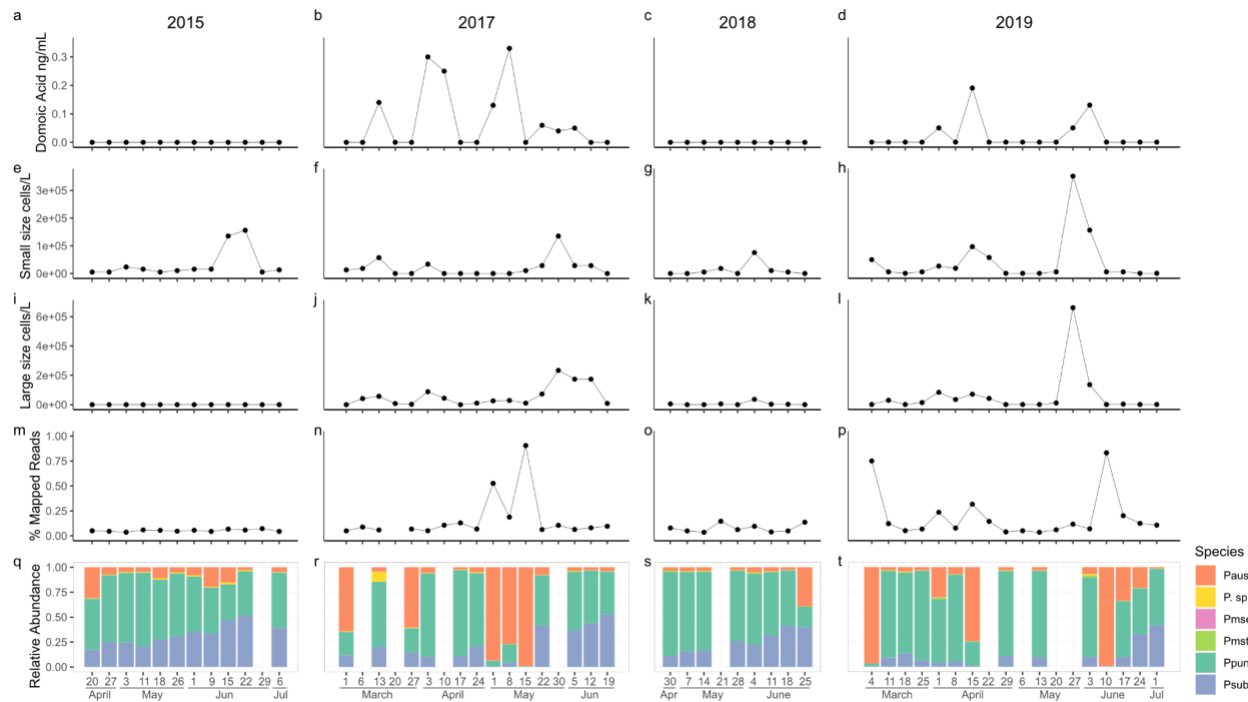

453  
 454 Figure 3. Dynamics of *Pseudo-nitzschia* spp. blooms sampled from Newport Beach Pier, CA. (a-  
 455 d) The concentration of particulate domoic acid (ng/mL) in seawater. (e-h) The concentration of  
 456 small size class (< 3 μm) cells per liter. (i-l) The concentration of large size class (> 3 μm) cells  
 457 per liter. (m-p) The percent of high quality reads exhibiting high quality mapping to the *Pseudo-*  
 458 *nitzschia* spp. reference library. (q-t) The relative abundance of *Pseudo-nitzschia* spp. calculated  
 459 as the proportion of high quality reads exhibiting high quality mapping to each individual species  
 460 relative to the total number of reads mapping to the *Pseudo-nitzschia* spp. reference library.  
 461

### 462 3.4 Abundance of species in natural *Pseudo-nitzschia* spp. blooms using ARISA

463 Seventeen distinctly-sized amplicons were observed with ARISA (Fig. 4). Ten were associated  
 464 with species previously reported along the US Pacific Coast based on reference sequences  
 465 available in GenBank and prior studies using ARISA (Carlson et al., 2016; Hubbard et al., 2014,  
 466 2008; Smith et al., 2018b). Half were putatively identified based on prior observations as *P.*  
 467 *australis*/*P. seriata* (which share the same fragment size, 150 base pairs [bp]), *P. inflatula* (156  
 468 bp), *P. delicatissima* (168 bp), *P. fraudulenta* (203 bp), and *P. fryxelliana* (207 bp). The other  
 469 half were associated with species based on prior observations and direct sequencing of PCR  
 470 products as part of the present study: *P. galaxiae* (140 bp), *P. pungens* (142 bp), *P. multiseriis*  
 471 (144 bp), *P. subpacificae* (196 bp) and *P. cuspidata* (233 bp); all were 100% similar to previously  
 472 observed sequences. The sequence obtained for *P. pungens* corresponded to *P. pungens* var.  
 473 *cingulata*. Seven additional amplicons of unknown identity were characterized by ARISA only  
 474 (170 bp, 177 bp, 200 bp, 210 bp, 213 bp, 219 bp, and 223/224 bp). A few samples (n=3) with  
 475 low total peak height were excluded from analysis (indicated by \* in Fig. 4).

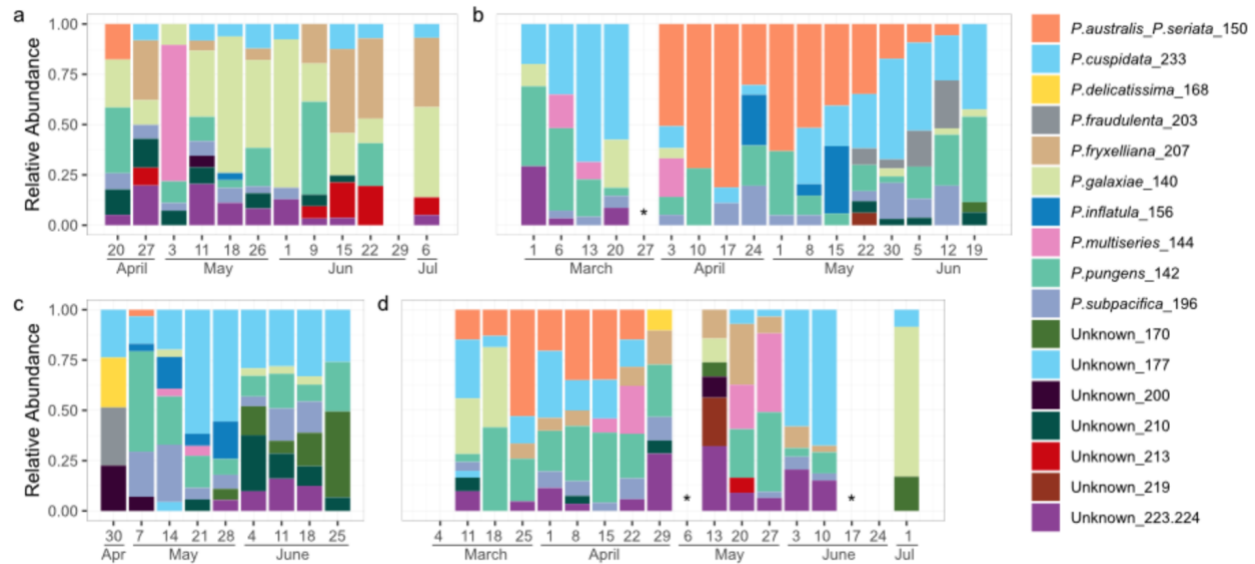

476

477 Figure 4. ARISA-based diversity profile of *Pseudo-nitzschia* spp. blooms sampled from Newport  
 478 Beach Pier, CA in (a) 2015, (b) 2017, (c) 2018, and (d) 2019. \* samples with low total peak height.

479

480 The *P. australis/P. seriata* fragment was observed in spring in all four years but the duration  
 481 varied from year to year: 2015 (April, one week), 2017 (April-June, 11 weeks), 2018 (May, one  
 482 week), and 2019 (March through April, seven weeks, Fig. 4). *Pseudo-nitzschia* cellular  
 483 abundances and pDA concentrations generally tracked well with *P. australis/P. seriata*. For  
 484 example, in 2015 and 2018, cellular abundances and pDA concentrations were minimal, and  
 485 increases in the former only were noted after the single observations of *P. australis/P. seriata*. In  
 486 contrast, in 2017 and 2019, cellular abundances and pDA concentrations were elevated and  
 487 dynamic for the time frame when the *P. australis/P. seriata* amplicon was present, and even in a  
 488 few samples where this amplicon was absent but other toxic species like *P. cuspidata* were  
 489 present (Fig. 3,4). *P. cuspidata* was observed in nearly every sample, but appeared to be quite  
 490 dynamic based on the relativized ARISA signal, and was detected before, during, and after *P.*  
 491 *australis/P. seriata* in all years except 2015, the year that *P. cuspidata* generally appeared to  
 492 comprise a smaller proportion of the *Pseudo-nitzschia* assemblage and when *P. galaxiae* was  
 493 more prevalent. *P. multiseriata* is another species recognized as producing high pDA levels and  
 494 was detected in all years, but was never the dominant taxon in the ARISA. *P. multiseriata* was  
 495 observed after *P. australis* in 2015, before and with *P. australis* in 2017, after *P. australis* in  
 496 2018, and with and after *P. australis* in 2019.

497

498 Although both methods identified an increase in *P. australis* in the high domoic acid years (2017  
 499 and 2019), correlations between relative abundance estimates for individual species obtained  
 500 using the different methods were weak or nonexistent. A significant correlation was detected  
 501 between the relative abundance of *P. australis* estimated via 2bRAD and the ARISA-based  
 502 estimate of *P. australis/P. seriata*, but the overall variance explained was less than 10%  
 503 ( $R^2=0.096$ ,  $t(40)=2.3$ ,  $p=0.03$ , Fig. S6). No relationships were detected for any of the other  
 504 species that could be compared between methods (*P. sp.*, *P. pungens*, *P. multiseriata*, *P.*

505 *subpacifica*) nor were any relationships evident when converting relative abundance to simple  
 506 presence/absence calls.

507

### 508 3.6 Population-level variation in *Pseudo-nitzschia* spp. over time

509 The low percentage of reads mapping to the *Pseudo-nitzschia* spp. reference in general (Fig. 3)  
 510 resulted in insufficient coverage for SNP calling in individual samples. For example, even for *P.*  
 511 *pungens*, the most abundant species across sampling time-points and years, 75% of samples  
 512 had fewer than 7 tags with at least 80x coverage, the minimum recommended threshold for  
 513 analysis of pooled samples (Schlötterer et al., 2014) (Fig. S7). Therefore, to assess the potential  
 514 for the 2bRAD method to yield information on population-level variation, we pooled samples by  
 515 year and compared changes in allele frequency between low domoic acid (DA, 2015 and 2018)  
 516 and high domoic acid years (2017 and 2019, Fig. 3) following (Bendall et al., 2016).

517

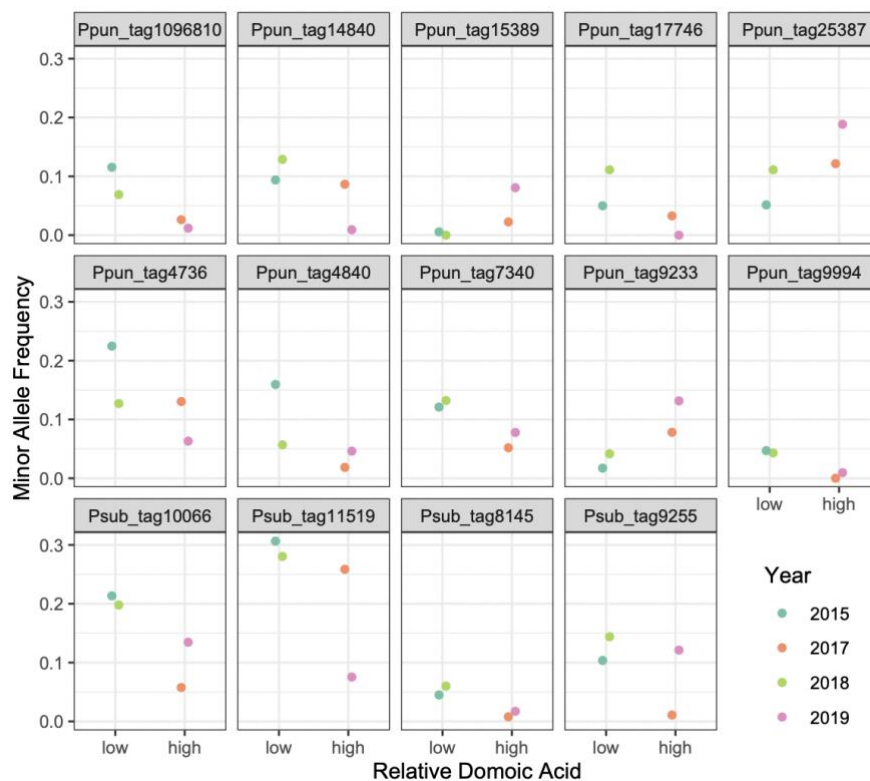

518

519

520

521

522

523

Figure 5. Minor allele frequency at select loci (CMH<0.05) by sampling year, stratified by the relative amount of domoic acid detected over the course of the sampling window. Ppun = *P. pungens*, Psub = *P. subpacifica*.

524

525

526

527

528

529

The relative abundances of *P. delicatissima*, *P. multiseriis*, and *P. multistriata* were too low to conduct population-level analyses with confidence (Fig. 3). No consistent changes in allele frequencies were detected in *P. australis* populations over time. We identified 17 SNPs in *P. pungens* and 4 SNPs in *P. subpacifica* that showed differences in allele frequencies across years (CMH<0.05). Of these, 10 in *P. pungens* and all of the *P. subpacifica* SNPs exhibited consistent changes between years with low and high pDA concentrations. In *P. subpacifica*, the



530 minor allele frequency (MAF) at all loci consistently decreased in years where pDA was  
531 observed whereas in *P. pungens*, MAF decreased at 7 loci and increased at 3 loci (Fig. 5, Table  
532 S3).

533

#### 534 4. DISCUSSION

535

536 In culture, the toxicity of *Pseudo-nitzschia* is influenced by both abiotic (Trainer et al., 2012) and  
537 biotic (Sison-Mangus et al., 2014) factors. In the Southern California Bight, while large-scale  
538 drivers of domoic acid outbreaks have been identified, the factors contributing to interannual  
539 variability in toxin production remain unresolved (Smith et al., 2018a). Inter- and intraspecies  
540 level variation in *Pseudo-nitzschia* is thought to play a key role in DA production (Clark et al.,  
541 2019; Fernandes et al., 2014; Guannel et al., 2015; Hubbard et al., 2014; Smith et al., 2018b).  
542 Here we show that a reduced representation based sequencing approach can be used to  
543 accurately quantify the relative abundance of *Pseudo-nitzschia* spp. in a mixed community. In  
544 addition, we were able to assess population-level genomic variation within focal *Pseudo-*  
545 *nitzschia* spp. using the same dataset. This method presents a potentially cost-effective  
546 approach for large-scale studies aiming to evaluate population and community dynamics in  
547 mixed samples, although additional development work is needed.

548

##### 549 4.1. *The dynamics of Pseudo-nitzschia blooms at Newport Beach Pier, CA.*

550 Analysis of a field sample set over high and low domoic acid years suggest a role for *P.*  
551 *australis* in DA production. However, the direct linear relationship between the relative  
552 abundance of *P. australis* as estimated through 2bRAD and pDA concentrations is weak,  
553 although corroborated by ARISA, suggesting that the toxicity of *P. australis* is not a linear  
554 function of its abundance, or that other members of the *Pseudo-nitzschia* spp. community or  
555 variability in their abundances may be involved. The parallel ARISA dataset generated for the  
556 same samples supports this latter explanation: in addition to the high prevalence of *P.*  
557 *australis*/*P. seriata*, additional toxigenic or suspected toxigenic species such as *P. cuspidata*, *P.*  
558 *pungens*, *P. multiseriata*, *P. fraudulenta*, *P. delicatissima*, *P. subpacifica* and *P. galaxiae* were  
559 also identified. An earlier ARISA based analysis of relative species abundance also identified *P.*  
560 *australis*/*P. seriata* in association with a strong DA event in 2013, but these species were absent  
561 in a similar bloom the following year (Smith et al., 2018b). ARISA cannot distinguish *P. australis*  
562 from *P. seriata* on the US west coast (Hubbard et al., 2008). Although *P. seriata* was not  
563 included in our reference library, the 2bRAD method is highly specific in terms of read  
564 recruitment and false positive rate, and given the strength of read recruitment to the *P. australis*  
565 reference when this species is dominant (Fig. S4), it is likely that *P. australis* rather than *P.*  
566 *seriata* is the dominant member of the *Pseudo-nitzschia* spp. assemblage for the years  
567 analyzed here, as false positives between sister species using the 2bRAD method, such as *P.*  
568 *pungens* and *P. multiseriata*, are minimal (~0.005%). If we can interpret the overall percent  
569 mapping as a reflection of the total composition (Fig. 3m-p), both for species within our *Pseudo-*  
570 *nitzschia* reference set and others, then *P. australis* may indeed dominate blooms in this region  
571 at certain sampling times and is often dominant when DA is detected. Indeed, both ARISA and  
572 2bRAD detected dynamic assemblages over time and a coincident increase in *P. australis* as

573 DA increased. However, an expansion of the 2bRAD reference library set and additional work  
574 will enable this supposition to be tested.

575  
576 Interestingly, we also identified apparent cyclical shifts in allele frequency in both *P. pungens*  
577 and *P. subpacificus* populations wherein the minor allele frequency increased or decreased  
578 corresponding with high vs low DA years (Fig. 5). Prior temporal analyses of population level  
579 variation in SNPs from natural bacterial populations have identified unidirectional shifts in allele  
580 frequency over time (Bendall et al., 2016). Population genetic analysis of *Pseudo-nitzschia* spp.  
581 has been limited to microsatellite-based characterization (Casteleyn et al., 2010). Globally  
582 sampled populations of *P. pungens* were found to exhibit strong isolation by distance, however,  
583 time-series samples were pooled by region (Casteleyn et al., 2010), potentially masking relevant  
584 temporal shifts which have been repeatedly identified in other marine diatoms (Godhe and  
585 Hårnström, 2010; Rynearson et al., 2006; Whittaker and Rynearson, 2017). Interestingly,  
586 morphologically and genetically distinct *P. pungens* varieties have been identified along the US  
587 West Coast (Carlson et al., 2016; Hubbard et al., 2014, 2008; Villac and Fryxell, 1998). Here we  
588 show that not only do allele frequencies show temporal shifts, in some instances these shifts  
589 correlate to some extent with the presence of DA (Fig. 5). It is unlikely that the SNPs identified  
590 here are causal, in the sense that they are responsible for DA production, but it is possible that  
591 certain *Pseudo-nitzschia* spp. populations are more associated with DA presence and/or  
592 production than others. The presence of competitors can alter both ecological and evolutionary  
593 outcomes (Agrawal et al., 2012). A competitive role for DA has been proposed, but the  
594 mechanism of action remains debated. DA has been hypothesized to play a role in iron uptake  
595 (Maldonado et al., 2002; Rue and Bruland, 2001; Wells et al., 2005). DA production has also  
596 been shown to facilitate the competitive ability of *P. delicatissima* in co-culture with *S. marinoi*  
597 (Prince et al., 2013) supporting an allelopathic role (Xu et al., 2015). Alternatively, the change in  
598 allele frequency may be the result of other co-occurring biotic or abiotic drivers (including ocean  
599 circulation) that influence DA production but also exert a selective force on other species.

600  
601 Whatever the reason, greater temporal and spatial resolution will help address these  
602 hypotheses. This can be accomplished by an increase in sequencing depth to obtain sufficient  
603 coverage for calling SNPs in an individual sample, which will increase per-sample sequencing  
604 costs. If the goal is to assess population level variation, it may be possible to enrich for the  
605 eukaryotic fraction by targeting not DNA, but RNA. Use of poly-A priming in the cDNA synthesis  
606 reaction can then be used to enrich for eukaryotes. This should not distort the relative  
607 abundance ratios of target taxa as the RNA to cDNA conversion does not involve any  
608 amplification, however, additional genotyping errors could be introduced during the conversion  
609 that could contribute to null alleles. Paired comparison of RNA and DNA based abundance  
610 estimates will be needed to evaluate the potential effectiveness of this modification.

611  
612 *4.2 Detection limit is driven by the false positive rate*

613 The false positive rate greatly exceeded the false negative rate, but both were low on average,  
614 with less than 1% of reads identified as false positives in the mock community mix experiment.  
615 Although the method was able to detect the presence of species at very low abundances (tested  
616 down to 0.01%), an average false positive rate of 0.45% suggests that the detection limit for

617 calling true positives should be set at 0.5-1%. Consequently, in the natural bloom sample set,  
618 although there were reads mapping to all species (Fig. 3q-t) only *P. australis*, *P. pungens*, and  
619 *P. subpacificus* were present at detectable levels. Interestingly, far fewer false positives were  
620 observed for reads mapping to the *P. multiseriatus* and *P. multistriatus* reference species, which  
621 were *in silico* derived by extracting Bcgl restriction sites from previously sequenced genomes.  
622 This despite *P. pungens* and *P. multiseriatus* being sibling species, which should increase overlap  
623 due to greater genetic similarity (Lim et al., 2018; Manhart et al., 1995). This suggests that some  
624 aspect of the culturing process may have contributed to artificially inflating the false positive  
625 rate. One explanation may be unintentional cross-contamination during the process of creating  
626 artificial community mixes, although the use of sterile technique makes this unlikely.  
627 Alternatively, false positives could still be the result of additional unknown contaminants  
628 (prokaryotic or eukaryotic), representatives of which have not yet been incorporated into the  
629 NCBI database. As 2b-RAD tags are only 36-bp in length, single base pair differences can be  
630 the difference between a match and a 'no hits' outcome. While we were able to identify and  
631 exclude the most contaminants using a global clustering approach, the vast majority of microbial  
632 diversity remains underexplored (Salazar and Sunagawa, 2017), and consequently cannot  
633 serve as a homology-based reference for filtering out contaminant reads. An alternative  
634 approach to excluding contaminants could be to focus not on homology based searches, which  
635 require a pre-existing reference database, but to use clustering algorithms, as have been  
636 developed for binning metagenomic sequence datasets using, for example tetranucleotide  
637 frequency and percent GC content (Graham et al., 2017). Future work should aim to explore if  
638 such alternative approaches can be applied to short read RAD datasets.

639  
640 Accuracy should also be taken into consideration when setting detection limits. Cell size was not  
641 measured, but would be expected to vary considerably, along with genome size, across the  
642 different species utilized herein (Hubbard et al., 2014). It is possible that these differences  
643 contribute to variability in the expected vs. observed signal. In the mock community mix  
644 experiment, we observed significant variation in accuracy among replicates. Perhaps counter-  
645 intuitively, more equal mixes (e.g. ratios of 50:50) exhibited lower accuracy than more extreme  
646 mixes (e.g. ratios of 99.9:0.1) and pure cultures. In addition, accuracy varied significantly among  
647 replicate cultures of the same species. Taken together, this suggests that the variation in  
648 accuracy is likely driven by inaccuracies during mix creation rather than errors in the assignment  
649 of reads during mapping or systematic biases among species. As mixes were generated using  
650 replicate Sedgwick Rafter-based counts of cell densities in culture replicates, any inaccuracy  
651 during mix creation would propagate in proportion to the final volume of culture added to each  
652 sample mix. More equal mixes necessitated mixing of larger volumes for each individual culture,  
653 increasing the chance for variation. As it will be impossible in field samples to quantify the  
654 absolute abundance of any given focal species without a universal reference library, and given  
655 the strong association between observed and expected abundance (Fig. 2a), so long as the  
656 organism passes the minimum detection limit, then our results suggest its relative abundance  
657 within the focal community can be reliably assessed.

658  
659  
660

661 4.3. *Low agreement of relative abundance estimates across methods.*

662 Both methods implicate *P. australis* as a driver of DA production in the natural sample set (Fig.  
663 3q-t, Fig. 4) reinforcing earlier reports from this region (*Schnetzer et al., 2013; Smith et al.,*  
664 *2018b*). However, direct comparison of the relative abundance estimates obtained using the  
665 different methods and even simple presence/absence determinations largely disagree. This  
666 discrepancy may be attributable to different methodological biases. After excluding samples  
667 below the 1% detection limit, 2bRAD still identified low abundances of *P. australis* (<5%) at  
668 almost all time-points (Fig. 3q-t) which were not evident in the ARISA analysis (Fig. 4). One  
669 explanation is false negatives in the ARISA analysis, as this method applies a 3% peak  
670 threshold. Lowering the ARISA limit of detection to 1% results in detection of *P. australis* in four  
671 additional samples, but a lowered threshold is not recommended without further quantitative  
672 validation. Alternatively, we cannot rule out the possibility that these low abundance detections  
673 are false positives in the 2bRAD analysis, as this method has a tendency to overestimate the  
674 abundance of species when rare, which is particularly evident in *P. australis* (Fig. 2a). Low  
675 agreement between methods is likely also driven by the limited diversity in the current 2bRAD  
676 reference library. The 2bRAD relative abundance estimates of all species will be artificially  
677 inflated by the inability to capture all the relevant diversity in *Pseudo-nitzschia* spp. Expansion of  
678 the reference library set to include additional relevant taxa for the region will help remedy this  
679 problem and shed more light on the ecology of this genus.

680

681 4.4 *Proteobacteria: contaminants or symbionts?*

682 Interactions between phytoplankton and bacteria are critical for nutrient cycling in aquatic  
683 environments, but recent work suggests that microscale interactions in the phycosphere, such  
684 as the exchange of metabolites, extend beyond general food web interactions into the realm of  
685 mutualism (Amin et al., 2012; Seymour et al., 2017). The essential relationship between diatoms  
686 and their associated bacteria may be why it is so difficult to obtain axenic phytoplankton cultures  
687 (Töpel et al., 2019). Bacteria have also been shown to enhance toxin production in *P.*  
688 *multiseriis* cultures (Bates et al., 1995) suggesting a key role for other microbes in the ecology  
689 of *Pseudo-nitzschia* spp. We identified a substantial community of *Proteobacteria* in our unialgal  
690 *Pseudo-nitzschia* spp. cultures, the profiles of which differed among species. All cultures  
691 contained representatives of taxa previously identified as putative associates of diatoms and  
692 *Pseudo-nitzschia* spp. including *Sulfitobacter pseudonitzschiae* and *Marinobacter salarius*  
693 (Hong et al., 2015; Johansson et al., 2019) which occurred at low abundance (<5%) in most  
694 species. However, *P. australis* exhibited the highest level of ‘contamination’ with over 24% of  
695 the total RAD tags identified as *Proteobacteria* (Fig. S2) and of these contaminant tags, more  
696 than 93% exhibited blast matches to *M. salarius* in NCBI’s nt database. *M. salarius* has been  
697 shown to stimulate the growth of the diatom *Skeletonema marinoi* in culture (Johansson et al.,  
698 2019). Genomic analysis suggests that *M. salarius* may produce a growth factor in addition to  
699 siderophores, which may increase iron availability for its host diatom (Töpel et al., 2019). Future  
700 culture-based work should aim to test whether *M. salarius* fulfills a similar role for *P. australis*.  
701 From a methods development perspective, since 2bRAD captures both prokaryotic and  
702 eukaryotic tags, an interesting next step would be to expand the reference to include key  
703 prokaryotic taxa to assess the change in relative abundance of putative proteobacterial  
704 symbionts in addition to target *Pseudo-nitzschia* spp. over the course of natural bloom events.

705

#### 706 4.5 Conclusions

707 Taken together, our results show that a reduced representation based sequencing approach  
708 can both quantify the relative abundance of *Pseudo-nitzschia* spp. in a mixed community and  
709 assess population-level genomic variation within species using the same dataset. Advantages  
710 of this method include simplicity of the library preparation protocol and cost-effectiveness (Puritz  
711 et al., 2014). Depending on the level of coverage desired, costs for both library preparation and  
712 sequencing range from ~\$10-\$40 a sample, whereas full metagenomic libraries, which also  
713 require additional computational power to analyze, are on the order of \$100 a sample. While  
714 other RAD methods could in principle be used, we advocate for 2bRAD for community level  
715 analyses as the fixed size of tags precludes the need for genome size corrections that would be  
716 necessary with other methods (Puritz et al., 2014), given that abundance is estimated from the  
717 total number of mapped reads, which is proportional to the per-taxa sequencing effort, rather  
718 than the mean coverage per tag. There are, however, some limitations that remain to be  
719 overcome. New species cannot be identified *a priori* in a mixed community. A RAD tag  
720 reference must first be generated. Culturing is a rate-limiting step for many methods, but with  
721 advances in single cell sequencing (Gawad et al., 2016), it may be possible to skip this step  
722 altogether in the near future in favor of cell sorting and direct sequencing (Cuvelier et al., 2010;  
723 Marie et al., 2017). By mining existing metagenomic datasets and other genome databases it  
724 may be possible to create a large-scale reference library that includes prokaryotes, archaea,  
725 and eukaryotes, to competitively recruit RAD tags from natural samples, thereby greatly  
726 expanding the taxonomic resolution of the method. Combined with the ability to secondarily  
727 assess population-scale variation for the most abundant members of the community, this  
728 method has the potential to greatly expand the scope of large-scale spatial and temporal  
729 monitoring studies, warranting additional development.

730

#### 731 Acknowledgements

732 We thank Carmelo Tomas for assistance in identification of *Pseudo-nitzschia* strains.

733

734 **Funding:** This publication was supported by NOAA Grant #NOA18OAR4170073, California Sea  
735 Grant College Program Project #115697431, through NOAA'S National Sea Grant College  
736 Program, U.S. Dept. of Commerce. The statements, findings, conclusions and  
737 recommendations are those of the author(s) and do not necessarily reflect the views of  
738 California Sea Grant, NOAA, the U.S. Environmental Protection Agency, or the U.S. Dept. of  
739 Commerce. ARISA analysis was supported via National Science Foundation Grant Number  
740 OCE-1840381, the National Institute of Environmental Health Sciences Grant Number  
741 1P01ES028938, and the Woods Hole Center for Oceans and Human Health.

742

743 **Data Accessibility:** FASTQ reads for both the Mock Community Mix and Natural Sample  
744 libraries can be obtained from NCBI's SRA under BioProject PRJNA749297. The final *Pseudo-*  
745 *nitzschia* spp. 2bRAD reference library is hosted at <https://dornsife.usc.edu/labs/carlslab/data/>.  
746 Bioinformatic and statistical scripts necessary to re-create analyses, as well as raw input data  
747 used to generate figures used in this study are available at [https://github.com/ckenkel/Pseudo-](https://github.com/ckenkel/Pseudo-nitzschia2bRAD)  
748 [nitzschia2bRAD](https://github.com/ckenkel/Pseudo-nitzschia2bRAD).

749 **References**

- 750 Adl, S.M., Leander, B.S., Simpson, A.G.B., Archibald, J.M., Anderson, O.R., Bass, D., Bowser,  
751 S.S., Brugerolle, G., Farmer, M.A., Karpov, S., Kolisko, M., Lane, C.E., Lodge, D.J., Mann,  
752 D.G., Meisterfeld, R., Mendoza, L., Moestrup, Ø., Mozley-Standridge, S.E., Smirnov, A.V.,  
753 Spiegel, F., Collins, T., Sullivan, J., 2007. Diversity, Nomenclature, and Taxonomy of  
754 Protists. *Syst. Biol.* 56, 684–689.
- 755 Agrawal, A.A., Hastings, A.P., Johnson, M.T.J., Maron, J.L., Salminen, J.-P., 2012. Insect  
756 herbivores drive real-time ecological and evolutionary change in plant populations. *Science*  
757 338, 113–116.
- 758 Alverson, A.J., 2008. Molecular Systematics and the Diatom Species. *Protist* 159, 339–353.
- 759 Amin, S.A., Parker, M.S., Armbrust, E.V., 2012. Interactions between diatoms and bacteria.  
760 *Microbiol. Mol. Biol. Rev.* 76, 667–684.
- 761 Anderson, C.R., Kudela, R.M., Kahru, M., Chao, Y., Rosenfeld, L.K., Bahr, F.L., Anderson,  
762 D.M., Norris, T.A., 2016. Initial skill assessment of the California Harmful Algae Risk  
763 Mapping (C-HARM) system. *Harmful Algae* 59, 1–18.
- 764 Anderson, D.M., Burkholder, J.M., Cochlan, W.P., Glibert, P.M., Gobler, C.J., Heil, C.A., Kudela,  
765 R.M., Parsons, M.L., Rensel, J.E.J., Townsend, D.W., Trainer, V.L., Vargo, G.A., 2008.  
766 Harmful algal blooms and eutrophication: Examining linkages from selected coastal regions  
767 of the United States. *Harmful Algae* 8, 39–53.
- 768 Assaf, G., Hannon, G.J., 2010. FASTX-toolkit. FASTX-Toolkit.
- 769 Bates, S.S., Douglas, D.J., Doucette, G.J., Léger, C., 1995. Enhancement of domoic acid  
770 production by reintroducing bacteria to axenic cultures of the diatom *Pseudo-nitzschia*  
771 *multiseriata*. *Nat. Toxins* 3, 428–435.
- 772 Bates, S.S., Hubbard, K.A., Lundholm, N., Montresor, M., Leaw, C.P., 2018. *Pseudo-nitzschia*,  
773 *Nitzschia*, and domoic acid: New research since 2011. *Harmful Algae* 79, 3–43.
- 774 Bejarano, A.C., VanDola, F.M., Gulland, F.M., Rowles, T.K., Schwacke, L.H., 2008. Production  
775 and Toxicity of the Marine Biotoxin Domoic Acid and Its Effects on Wildlife: A Review.  
776 *Human and Ecological Risk Assessment: An International Journal* 14, 544–567.
- 777 Bendall, M.L., Stevens, S.L., Chan, L.-K., Malfatti, S., Schwientek, P., Tremblay, J., Schackwitz,  
778 W., Martin, J., Pati, A., Bushnell, B., Froula, J., Kang, D., Tringe, S.G., Bertilsson, S.,  
779 Moran, M.A., Shade, A., Newton, R.J., McMahon, K.D., Malmstrom, R.R., 2016. Genome-  
780 wide selective sweeps and gene-specific sweeps in natural bacterial populations. *ISME J.*  
781 10, 1589–1601.
- 782 Bornet, B., Antoine, E., Françoise, S., Baut, C.M., 2005. Development of sequence  
783 characterized amplified region markers from intersimple sequence repeat fingerprints for  
784 the molecular detection of toxic phytoplankton *Alexandrium catenella* (dinophyceae) and  
785 *Pseudo-nitzschia pseudodelicatissima* (bacillariophyceae) from french coastal waters1. *J.*  
786 *Phycol.* 41, 704–711.
- 787 Bruin, A. de, Ibelings, B.W., Van Donk, E., 2003. Molecular techniques in phytoplankton  
788 research: from allozyme electrophoresis to genomics. *Hydrobiologia* 491, 47–63.
- 789 Bushnell, B., 2014. BBMap: A Fast, Accurate, Splice-Aware Aligner (No. LBNL-7065E).  
790 Lawrence Berkeley National Lab. (LBNL), Berkeley, CA (United States).
- 791 Carlson, M.C.G., McCary, N.D., Leach, T.S., Rocap, G., 2016. *Pseudo-nitzschia* Challenged  
792 with Co-occurring Viral Communities Display Diverse Infection Phenotypes. *Front.*  
793 *Microbiol.* 7, 527.
- 794 Casteleyn, G., Leliaert, F., Backeljau, T., Debeer, A.-E., Kotaki, Y., Rhodes, L., Lundholm, N.,  
795 Sabbe, K., Vyverman, W., 2010. Limits to gene flow in a cosmopolitan marine planktonic  
796 diatom. *Proc. Natl. Acad. Sci. U. S. A.* 107, 12952–12957.
- 797 Clark, S., Hubbard, K.A., Anderson, D.M., McGillicuddy, D.J., Ralston, D.K., Townsend, D.W.,  
798 2019. *Pseudo-nitzschia* bloom dynamics in the Gulf of Maine: 2012–2016. *Harmful Algae*

- 799 88, 101656.
- 800 Cochlan, W.P., Herndon, J., Kudela, R.M., 2008. Inorganic and organic nitrogen uptake by the  
801 toxigenic diatom *Pseudo-nitzschia australis* (Bacillariophyceae). *Harmful Algae* 8, 111–118.
- 802 Countway, P.D., Gast, R.J., Savai, P., Caron, D.A., 2005. Protistan diversity estimates based on  
803 18S rDNA from seawater incubations in the Western North Atlantic. *J. Eukaryot. Microbiol.*  
804 52, 95–106.
- 805 Cuvelier, M.L., Allen, A.E., Monier, A., McCrow, J.P., Messié, M., Tringe, S.G., Woyke, T.,  
806 Welsh, R.M., Ishoey, T., Lee, J.-H., Binder, B.J., DuPont, C.L., Latasa, M., Guigand, C.,  
807 Buck, K.R., Hilton, J., Thiagarajan, M., Caler, E., Read, B., Lasken, R.S., Chavez, F.P.,  
808 Worden, A.Z., 2010. Targeted metagenomics and ecology of globally important uncultured  
809 eukaryotic phytoplankton. *Proc. Natl. Acad. Sci. U. S. A.* 107, 14679–14684.
- 810 Davey, J.W., Blaxter, M.L., 2010. RADSeq: next-generation population genetics. *Brief. Funct.*  
811 *Genomics* 9, 416–423.
- 812 Evans, K.M., Bates, S.S., Medlin, L.K., Hayes, P.K., 2004. Microsatellite marker development  
813 and genetic variation in the toxic marine diatom pseudo-*Nitzschia multiseriis*  
814 (Bacillariophyceae)1. *J. Phycol.* 40, 911–920.
- 815 Evans, K.M., Hayes, P.K., 2004. Microsatellite markers for the cosmopolitan marine diatom  
816 *Pseudo-nitzschia pungens*. *Mol. Ecol. Notes* 4, 125–126.
- 817 Fehling, J., Davidson, K., Bolch, C.J., Bates, S.S., 2004. Growth and domoic acid production by  
818 pseudo-*nitzschia seriata* (bacillariophyceae) under phosphate and silicate limitation. *J.*  
819 *Phycol.* 40, 674–683.
- 820 Fernandes, L.F., Hubbard, K.A., Richlen, M.L., Smith, J., Bates, S.S., Ehrman, J., Léger, C.,  
821 Mafra, L.L., Kulis, D., Quilliam, M., Libera, K., McCauley, L., Anderson, D.M., 2014.  
822 Diversity and toxicity of the diatom *Pseudo-nitzschia Peragallo* in the Gulf of Maine,  
823 Northwestern Atlantic Ocean. *Deep Sea Res. Part 2 Top. Stud. Oceanogr.* 103, 139–162.
- 824 Fu, L., Niu, B., Zhu, Z., Wu, S., Li, W., 2012. CD-HIT: accelerated for clustering the next-  
825 generation sequencing data. *Bioinformatics* 28, 3150–3152.
- 826 Gawad, C., Koh, W., Quake, S.R., 2016. Single-cell genome sequencing: current state of the  
827 science. *Nat. Rev. Genet.* 17, 175–188.
- 828 Godhe, A., Härnström, K., 2010. Linking the planktonic and benthic habitat: genetic structure of  
829 the marine diatom *Skeletonema marinoi*. *Mol. Ecol.* 19, 4478–4490.
- 830 Graham, E.D., Heidelberg, J.F., Tully, B.J., 2017. BinSanity: unsupervised clustering of  
831 environmental microbial assemblies using coverage and affinity propagation. *PeerJ* 5,  
832 e3035.
- 833 Guannel, M.L., Haring, D., Twiner, M.J., Wang, Z., Noble, A.E., Lee, P.A., Saito, M.A., Rocap,  
834 G., 2015. Toxigenicity and biogeography of the diatom *Pseudo-nitzschia* across distinct  
835 environmental regimes in the South Atlantic Ocean. *Mar. Ecol. Prog. Ser.* 526, 67–87.
- 836 Hasle, G.R., Syvertsen, E.E., 1997. Chapter 2 - Marine Diatoms, in: Tomas, C.R. (Ed.),  
837 *Identifying Marine Phytoplankton*. Academic Press, San Diego, pp. 5–385.
- 838 Hohenlohe, P.A., Bassham, S., Etter, P.D., Stiffler, N., Johnson, E.A., Cresko, W.A., 2010.  
839 Population Genomics of Parallel Adaptation in Threespine Stickleback using Sequenced  
840 RAD Tags. *PLoS Genet.* 6, e1000862.
- 841 Hong, Z., Lai, Q., Luo, Q., Jiang, S., Zhu, R., Liang, J., Gao, Y., 2015. Sulfitebacter  
842 *pseudonitzschiae* sp. nov., isolated from the toxic marine diatom *Pseudo-nitzschia*  
843 *multiseriis*. *Int. J. Syst. Evol. Microbiol.* 65, 95–100.
- 844 Howard, M.D.A., Cochlan, W.P., Ladizinsky, N., Kudela, R.M., 2007. Nitrogenous preference of  
845 toxigenic *Pseudo-nitzschia australis* (Bacillariophyceae) from field and laboratory  
846 experiments. *Harmful Algae* 6, 206–217.
- 847 Hubbard, K.A., Olson, C.H., Armbrust, E.V., 2014. Molecular characterization of *Pseudo-*  
848 *nitzschia* community structure and species ecology in a hydrographically complex estuarine  
849 system (Puget Sound, Washington, USA). *Mar. Ecol. Prog. Ser.* 507, 39–55.

- 850 Hubbard, K.A., Rocap, G., Armbrust, V.E., 2008. Inter- and intraspecific community structure  
851 within the diatom genus *Pseudo-nitzschia* (Bacillariophyceae). *J. Phycol.* 44, 637–649.
- 852 Johansson, O.N., Pinder, M.I.M., Ohlsson, F., Egardt, J., Töpel, M., Clarke, A.K., 2019. Friends  
853 With Benefits: Exploring the Phycosphere of the Marine Diatom *Skeletonema marinoi*.  
854 *Front. Microbiol.* 10, 1828.
- 855 Kofler, R., Pandey, R.V., Schlotterer, C., 2011. PoPoolation2: identifying differentiation between  
856 populations using sequencing of pooled DNA samples (Pool-Seq). *Bioinformatics* 27,  
857 3435–3436.
- 858 Kudela, R.M., Bickel, A., Carter, M.L., Howard, M.D.A., Rosenfeld, L., 2015. Chapter 5 - The  
859 Monitoring of Harmful Algal Blooms through Ocean Observing: The Development of the  
860 California Harmful Algal Bloom Monitoring and Alert Program, in: Liu, Y., Kerkering, H.,  
861 Weisberg, R.H. (Eds.), *Coastal Ocean Observing Systems*. Academic Press, Boston, pp.  
862 58–75.
- 863 Kudela, R.M., Cochlan, W.P., Roberts, A., 2002. Spatial and temporal patterns of *Pseudo-*  
864 *nitzschia* species in central California related to regional oceanography, in: *Harmful Algae*.  
865 Florida Fish and Wildlife Conservation Commission, Florida Institute of Oceanography, and  
866 Intergovernmental Oceanographic Commission of UNESCO, St. Petersburg, FL.
- 867 Kudela, R.M., Lane, J.Q., Cochlan, W.P., 2008. The potential role of anthropogenically derived  
868 nitrogen in the growth of harmful algae in California, USA. *Harmful Algae* 8, 103–110.
- 869 Kvitek, R.G., Goldberg, J.D., Smith, G.J., Doucette, G.J., Silver, M.W., 2008. Domoic acid  
870 contamination within eight representative species from the benthic food web of Monterey  
871 Bay, California, USA. *Mar. Ecol. Prog. Ser.* 367, 35–47.
- 872 Langlois, G., Zubkowsky-White, V., Christen, J., Rankin, S., 2014. Marine Biotxin Monitoring  
873 Program Annual Report. California Department of Public Health.
- 874 Langmead, B., Salzberg, S.L., 2012. Fast gapped-read alignment with Bowtie 2. *Nat. Methods*  
875 9, 357–359.
- 876 Lelong, A., Hégarret, H., Soudant, P., Bates, S.S., 2012. *Pseudo-nitzschia* (Bacillariophyceae)  
877 species, domoic acid and amnesic shellfish poisoning: revisiting previous paradigms.  
878 *Phycologia* 51, 168–216.
- 879 Lim, H.C., Lim, P.T., Teng, S.T., Bates, S.S., Leaw, C.P., 2014. Genetic structure of *Pseudo-*  
880 *nitzschia pungens* (Bacillariophyceae) populations: Implications of a global diversification of  
881 the diatom. *Harmful Algae* 37, 142–152.
- 882 Lim, H.C., Tan, S.N., Teng, S.T., Lundholm, N., Orive, E., David, H., Quijano-Scheggia, S.,  
883 Leong, S.C.Y., Wolf, M., Bates, S.S., Lim, P.T., Leaw, C.P., 2018. Phylogeny and species  
884 delineation in the marine diatom *Pseudo-nitzschia* (Bacillariophyta) using *cox1*, *LSU*, and  
885 *ITS2* rRNA genes: A perspective in character evolution. *J. Phycol.* 54, 234–248.
- 886 Li, W., Godzik, A., 2006. Cd-hit: a fast program for clustering and comparing large sets of  
887 protein or nucleotide sequences. *Bioinformatics* 22, 1658–1659.
- 888 Lynch, M., Milligan, B.G., 1994. Analysis of population genetic structure with RAPD markers.  
889 *Mol. Ecol.* 3, 91–99.
- 890 Maldonado, M.T., Hughes, M.P., Rue, E.L., Wells, M.L., 2002. The effect of Fe and Cu on  
891 growth and domoic acid production by *Pseudo-nitzschia multiseries* and *Pseudo-nitzschia*  
892 *australis*. *Limnol. Oceanogr.* 47, 515–526.
- 893 Manhart, J.R., Fryxell, G.A., Villac, M.C., Segura, L.Y., 1995. *Pseudo-Nitzschia pungens* and p.  
894 *Multiseries* (Bacillariophyceae): Nuclear ribosomal DNAs and species differences 1. *J.*  
895 *Phycol.* 31, 421–427.
- 896 Marie, D., Le Gall, F., Edern, R., Gourvil, P., Vaultot, D., 2017. Improvement of phytoplankton  
897 culture isolation using single cell sorting by flow cytometry. *J. Phycol.* 53, 271–282.
- 898 Matz, M.V., 2018. Fantastic Beasts and How To Sequence Them: Ecological Genomics for  
899 Obscure Model Organisms. *Trends Genet.* 34, 121–132.
- 900 Moore, S.K., Dreyer, S.J., Ekstrom, J.A., Moore, K., Norman, K., Klinger, T., Allison, E.H.,



- 901 Jardine, S.L., 2020. Harmful algal blooms and coastal communities: Socioeconomic  
902 impacts and actions taken to cope with the 2015 U.S. West Coast domoic acid event.  
903 *Harmful Algae* 96, 101799.
- 904 Moriarty, M.E., Tinker, M.T., Miller, M.A., Tomoleoni, J.A., Staedler, M.M., Fujii, J.A., Batac, F.I.,  
905 Dodd, E.M., Kudela, R.M., Zubkousky-White, V., Johnson, C.K., 2021. Exposure to domoic  
906 acid is an ecological driver of cardiac disease in southern sea otters☆. *Harmful Algae* 101,  
907 101973.
- 908 Orsini, L., Procaccini, G., Sarno, D., Montresor, M., 2004. Multiple rDNA ITS-types within the  
909 diatom *Pseudo-nitzschia delicatissima* (Bacillariophyceae) and their relative abundances  
910 across a spring bloom in the Gulf of Naples. *Mar. Ecol. Prog. Ser.* 271, 87–98.
- 911 Osuna-Cruz, C.M., Bilcke, G., Vancaester, E., De Decker, S., Bones, A.M., Winge, P., Poulsen,  
912 N., Bulankova, P., Verhelst, B., Audoor, S., Belisova, D., Pargana, A., Russo, M., Stock, F.,  
913 Cirri, E., Brembu, T., Pohnert, G., Piganeau, G., Ferrante, M.I., Mock, T., Sterck, L., Sabbe,  
914 K., De Veylder, L., Vyverman, W., Vandepoele, K., 2020. The *Seminavis robusta* genome  
915 provides insights into the evolutionary adaptations of benthic diatoms. *Nat. Commun.* 11,  
916 3320.
- 917 Prince, E.K., Irmer, F., Pohnert, G., 2013. Domoic acid improves the competitive ability of  
918 *Pseudo-nitzschia delicatissima* against the diatom *Skeletonema marinoi*. *Mar. Drugs* 11,  
919 2398–2412.
- 920 Puritz, J.B., Matz, M.V., Toonen, R.J., Weber, J.N., Bolnick, D.I., Bird, C.E., 2014. Demystifying  
921 the RAD fad. *Mol. Ecol.* 23, 5937–5942.
- 922 R Core Team, Others, 2017. R: A language and environment for statistical computing. R  
923 Foundation for Statistical Computing, Vienna, Austria. Vienna, Austria.
- 924 Round, F.E., Crawford, R.M., Mann, D.G., 1990. *Diatoms: Biology and Morphology of the*  
925 *Genera*. Cambridge University Press.
- 926 Rue, E., Bruland, K., 2001. Domoic acid binds iron and copper: a possible role for the toxin  
927 produced by the marine diatom *Pseudo-nitzschia*. *Mar. Chem.* 76, 127–134.
- 928 Ryneerson, T.A., Newton, J.A., Armbrust, E.V., 2006. Spring bloom development, genetic  
929 variation, and population succession in the planktonic diatom *Ditylum brightwellii*. *Limnol.*  
930 *Oceanogr.* 51, 1249–1261.
- 931 Salazar, G., Sunagawa, S., 2017. Marine microbial diversity. *Curr. Biol.* 27, R489–R494.
- 932 Sayers, E.W., Cavanaugh, M., Clark, K., Ostell, J., Pruitt, K.D., Karsch-Mizrachi, I., 2019.  
933 GenBank. *Nucleic Acids Res.* 47, D94–D99.
- 934 Schlötterer, C., Tobler, R., Kofler, R., Nolte, V., 2014. Sequencing pools of individuals — mining  
935 genome-wide polymorphism data without big funding. *Nat. Rev. Genet.* 15, 749–763.
- 936 Schnetzer, A., Jones, B.H., Schaffner, R.A., Cetinic, I., Fitzpatrick, E., Miller, P.E., Seubert, E.L.,  
937 Caron, D.A., 2013. Coastal upwelling linked to toxic *Pseudo-nitzschia australis* blooms in  
938 Los Angeles coastal waters, 2005–2007. *J. Plankton Res.* 35, 1080–1092.
- 939 Schoch, C.L., Ciufo, S., Domrachev, M., Hotton, C.L., Kannan, S., Khovanskaya, R., Leipe, D.,  
940 Mcveigh, R., O’Neill, K., Robbertse, B., Sharma, S., Soussov, V., Sullivan, J.P., Sun, L.,  
941 Turner, S., Karsch-Mizrachi, I., 2020. NCBI Taxonomy: a comprehensive update on  
942 curation, resources and tools. *Database* 2020. <https://doi.org/10.1093/database/baaa062>
- 943 Scholin, C.A., Gulland, F., Doucette, G.J., Benson, S., Busman, M., Chavez, F.P., Cordaro, J.,  
944 DeLong, R., De Vogelaere, A., Harvey, J., Haulena, M., Lefebvre, K., Lipscomb, T.,  
945 Loscutoff, S., Lowenstine, L.J., Marin, R., 3rd, Miller, P.E., McLellan, W.A., Moeller, P.D.,  
946 Powell, C.L., Rowles, T., Silvagni, P., Silver, M., Spraker, T., Trainer, V., Van Dolah, F.M.,  
947 2000. Mortality of sea lions along the central California coast linked to a toxic diatom  
948 bloom. *Nature* 403, 80–84.
- 949 Seubert, E.L., Gellene, A.G., Howard, M.D.A., Connell, P., Ragan, M., Jones, B.H., Runyan, J.,  
950 Caron, D.A., 2013. Seasonal and annual dynamics of harmful algae and algal toxins  
951 revealed through weekly monitoring at two coastal ocean sites off southern California,

- 952 USA. Environ. Sci. Pollut. Res. Int. 20, 6878–6895.
- 953 Seymour, J.R., Amin, S.A., Raina, J.-B., Stocker, R., 2017. Zooming in on the phycosphere: the  
954 ecological interface for phytoplankton–bacteria relationships. *Nature Microbiology* 2, 1–12.
- 955 Sison-Mangus, M.P., Jiang, S., Tran, K.N., Kudela, R.M., 2014. Host-specific adaptation  
956 governs the interaction of the marine diatom, *Pseudo-nitzschia* and their microbiota. *ISME*  
957 *J.* 8, 63–76.
- 958 Smith, J., Connell, P., Evans, R.H., Gellene, A.G., Howard, M.D.A., Jones, B.H., Kaveggia, S.,  
959 Palmer, L., Schnetzer, A., Seegers, B.N., Seubert, E.L., Tatters, A.O., Caron, D.A., 2018a.  
960 A decade and a half of *Pseudo-nitzschia* spp. and domoic acid along the coast of southern  
961 California. *Harmful Algae* 79, 87–104.
- 962 Smith, J., Gellene, A.G., Hubbard, K.A., Bowers, H.A., Kudela, R.M., Hayashi, K., Caron, D.A.,  
963 2018b. *Pseudo-nitzschia* species composition varies concurrently with domoic acid  
964 concentrations during two different bloom events in the Southern California Bight. *J.*  
965 *Plankton Res.* 40, 29–45.
- 966 Tatters, A.O., Fu, F.-X., Hutchins, D.A., 2012. High CO<sub>2</sub> and silicate limitation synergistically  
967 increase the toxicity of *Pseudo-nitzschia fraudulenta*. *PLoS One* 7, e32116.
- 968 Töpel, M., Pinder, M.I.M., Johansson, O.N., Kourtchenko, O., Godhe, A., Clarke, A.K., 2019.  
969 Whole Genome Sequence of *Marinobacter salarius* Strain SMR5, Shown to Promote  
970 Growth in its Diatom Host. *J Genomics* 7, 60–63.
- 971 Trainer, V.L., Adams, N.G., Bill, B.D., Stehr, Wekell John C., Moeller, P., Busman, M., Woodruff,  
972 D., 2000. Domoic acid production near California coastal upwelling zones, June 1998.  
973 *Limnol. Oceanogr.* 45, 1818–1833.
- 974 Trainer, V.L., Bates, S.S., Lundholm, N., Thessen, A.E., Cochlan, W.P., Adams, N.G., Trick,  
975 C.G., 2012. *Pseudo-nitzschia* physiological ecology, phylogeny, toxicity, monitoring and  
976 impacts on ecosystem health. *Harmful Algae* 14, 271–300.
- 977 Trainer, V.L., Hickey, B.M., Lessard, E.J., Cochlan, W.P., Trick, C.G., Wells Mark L.,  
978 MacFadyen Amoreena, Moore Stephanie K., 2009. Variability of *Pseudo-nitzschia* and  
979 domoic acid in the Juan de Fuca eddy region and its adjacent shelves. *Limnol. Oceanogr.*  
980 54, 289–308.
- 981 Trainer, V.L., Pitcher, G.C., Reguera, B., Smayda, T.J., 2010. The distribution and impacts of  
982 harmful algal bloom species in eastern boundary upwelling systems. *Prog. Oceanogr.* 85,  
983 33–52.
- 984 Villac, M.C., Fryxell, G.A., 1998. *Pseudo-nitzschia pungens* var. *cingulata* var. nov.  
985 (*Bacillariophyceae*) based on field and culture observations. *Phycologia* 37, 269–274.
- 986 Wang, S., Meyer, E., McKay, J.K., Matz, M.V., 2012. 2b-RAD: a simple and flexible method for  
987 genome-wide genotyping. *Nat. Methods* 9, 808–810.
- 988 Wells, M.L., Trick, C.G., Cochlan, W.P., Hughes, M.P., Trainer, V.L., 2005. Domoic acid: The  
989 synergy of iron, copper, and the toxicity of diatoms. *Limnol. Oceanogr.* 50, 1908–1917.
- 990 Wessells, C.R., Miller, C.J., Brooks, P.M., 1995. Toxic Algae Contamination and Demand for  
991 Shellfish: A Case Study of Demand for Mussels in Montreal. *Mar. Resour. Econ.* 10, 143–  
992 159.
- 993 Whittaker, K.A., Rynearson, T.A., 2017. Evidence for environmental and ecological selection in  
994 a microbe with no geographic limits to gene flow. *Proceedings of the National Academy of*  
995 *Sciences* 114, 2651–2656.
- 996 Xu, N., Tang, Y.Z., Qin, J., Duan, S., Gobler, C.J., 2015. Ability of the marine diatoms *Pseudo-*  
997 *nitzschia* multiseries and *P. pungens* to inhibit the growth of co-occurring phytoplankton via  
998 allelopathy. *Aquat. Microb. Ecol.* 74, 29–41.

999
